# Supplementary material
Source: PubMed Central journal article supplement (PMC3663537)
Supplement: supp_M113.453936_jbc.M113.453936-1.pdf [file supp_M113.453936_jbc.M113.453936-1.pdf]

Supplementary Material for

Disruption of *Tll5/Stamp* gene in male mice causes sperm malformation and infertility

Geun-Shik Lee†, Yuanzheng He†, Edward J. Dougherty†, Maria Jimenez-Movilla¶, Matteo Avella¶, Sean Grullon§, David S. Sharlin‡, Chunhua Guo†, John A. Blackford, Jr.†, Smita Awasthi†, Zhenhuan Zhang†, Stephen P. Armstrong†, Edra C. London†, Weiping Chen‡‡, Jurrien Dean¶, and S. Stoney Simons, Jr.\*†

From the †Steroid Hormones Section, NIDDK/LERB, ¶Laboratory of Cellular and Developmental Biology, NIDDK, §Adipocyte Biology and Gene Regulation Section, NIDDK/LERB, ‡Nuclear Receptor Biology Section, NIDDK/LERB, ‡‡Genomic Core, NIDDK, and National Institutes of Health, Bethesda, MD

\*Address correspondence to Dr. S. Stoney Simons, Jr., Bldg. 10, Room 8N-307B, NIDDK/LERB, NIH, Bethesda, MD 20892-1772 (e-mail: [stoneys@helix.nih.gov](mailto:stoneys@helix.nih.gov); Phone: 301-496-6796; FAX: 301-402-3572)

## Tables

Table S1: Oligonucleotide primers for RT-PCR quantitation of known genes involved in spermatogenesis.

| Gene          | Gene bank ID | Oligonucleotide sequences |                       | PCR product size (bp) |
|---------------|--------------|---------------------------|-----------------------|-----------------------|
|               |              | Forward (5' to 3')        | Reverse (5' to 3')    |                       |
| Gopc          | NM_053187    | TGTGCATGGTATTGGAGCAT      | AAAGCTTGGGAACAGCTCAA  | 107                   |
| Agfg1 (Hrb)   | NM_010472    | CCTCGGTTTCATGCGTCTATT     | TCTCCCAACAGGGATTTTCAG | 88                    |
| Csnk2a2       | NM_009974    | TGCTCATCCATACGCTCTTG      | AGCAGAGACCCTGCACATCT  | 83                    |
| Gba2          | NM_172692    | CAGGCGGTATACACGGTTCT      | GTTCTGCCAGGCTGAGATTC  | 112                   |
| Tekt2         | NM_011902    | CCCAAAGACTCCACCACACT      | TCTGAGCGTCCAGTTCATTG  | 148                   |
| Tekt4         | NM_027951    | ACAAGCCGTGGACCAGATAC      | TGGGTGCTCTCATTGGTGTA  | 126                   |
| Vdac3         | NM_011696    | ATAAACCTGGCATGGACAGC      | TCGGAGGGTCTGCGTATAAC  | 141                   |
| Sepp1         | NM_001042613 | TGACAAAATCAGCCCATGAA      | TGAGTTGGGGAGAGGTATGC  | 125                   |
| Akap4         | NM_001042542 | GTGAGAGCCCTTTCAGTTGC      | GGCATTGCTCTTCAGGTCTC  | 111                   |
| Spag6         | NM_015773    | TCGCAGCTGATTGTTAATGC      | CAGAATGAGCAGCCACGTAA  | 118                   |
| Gapdhs        | NM_008085    | CCAAGCCTGCTTCTTACTCG      | GACCACCTGGTCCTCTGTGT  | 98                    |
| Adcy10 (sAC)  | NM_173029    | AACGTTTCGTGGAGTTGGTTC     | GACCTCGACAGAGGCTTGAC  | 119                   |
| Catsper1      | NM_139301    | CGGGTCCATGAGAAGTTGTT      | CGCTGCTTCACTGTCATGTT  | 134                   |
| Catsper2      | NM_153075    | TATCTTCATGCATCCCACCA      | AGGCTCGAGTCCTTCAACAA  | 134                   |
| Catsper3      | NM_029772    | GTTGATGGCTGGACTGACCT      | TGAAGGATGCAAGCAAGATG  | 97                    |
| Catsper4      | NM_001130030 | CCTTATCTGCGAGGTTCTGC      | CCCATGTTCTGGAAATGCTT  | 120                   |
| Tnp1          | NM_009407    | GCATGAGGAGAGGCAAGAAC      | AGGACGCTCTTCCGGTATTT  | 82                    |
| Tnp2          | NM_013694    | TCGACACTCACCTGCAAGAC      | CTTGTATCTTCGCCCTGAGC  | 148                   |
| H1fnt (H1t2)  | NM_027304    | CAAGGAAAAGCATGCACAAA      | TTGGAGCCCATATGGAAAAG  | 115                   |
| Creml         | NM_001110850 | ACTAGCACGGGGCAATACAC      | TCTGCTAGTTGCTGGGGACT  | 134                   |
| Tbpl1         | NM_011603    | GCACTGGAGCAACAAGTGAA      | GCCAAAACATTCACCACCTT  | 118                   |
| Papolb (Tpap) | NM_019943    | TGCACTGAGTGAAAGCATCC      | GGATTGGGTATGTTTCGTTGC | 150                   |
| Piwil1 (Miwi) | NM_021311    | AACCCTCTTCCAGGGACAGT      | CAGGCCACTGCTGTCATAGA  | 138                   |
| Spem1         | NM_028855    | TGTTACCCCTTGGTCTCTGG      | TTTTGTCCCCAGTCACCTTC  | 93                    |

Table S2: Microarray results from testes of wt and *Stamp*<sup>tm/tm</sup> mice of heterogeneous genetic background showing genes altered at the whole gene level.

| Gene Symbol          | GeneBank ID        | p-value<br>(TM vs. Wt) | Fold-Change<br>(TM vs. Wt) |
|----------------------|--------------------|------------------------|----------------------------|
| Tshr                 | NM_011648          | 1.18E-05               | 3.8353                     |
| Prps111              | NM_029294          | 1.20E-06               | 3.0273                     |
| 2810002N01Rik        | AK160910           | 0.00010739             | 2.6625                     |
| Egr2                 | NM_010118          | 0.0407268              | 1.9572                     |
| Tdgf1                | NM_011562          | 0.000602837            | 1.8829                     |
| Scn10a               | NM_009134          | 4.01E-05               | 1.8547                     |
| Acp1                 | NM_001110239       | 0.00521885             | 1.7907                     |
| Snapc1               | NM_178392          | 0.00525204             | 1.7417                     |
| Gtf2a1               | NM_175335          | 0.00246929             | 1.7366                     |
| Ier3                 | NM_133662          | 0.0134473              | 1.7131                     |
| <b><u>Egr1</u></b>   | NM_007913          | 0.027533               | 1.7067                     |
| Ier2                 | NM_010499          | 0.0185166              | 1.6569                     |
| Rhbg                 | NM_021375          | 0.00140725             | 1.6182                     |
| Serpina3c            | NM_008458          | 0.0385444              | 1.5849                     |
| Hdac9                | NM_024124          | 0.00529439             | 1.5803                     |
| Fbxw15               | NM_199036          | 0.030944               | 1.5629                     |
| Heg1                 | NM_175256          | 0.0484089              | 1.5455                     |
| <b><u>Nr4a1</u></b>  | NM_010444          | 0.00696652             | 1.5352                     |
| 1520401A03Rik        | ENSMUST00000062827 | 0.0490243              | 1.5049                     |
| Usp48                | NM_130879          | 0.0342822              | -1.5207                    |
| <b><u>Dio2</u></b>   | NM_010050          | 0.00230444             | -1.5346                    |
| Eif4e                | NM_007917          | 0.00820991             | -1.5439                    |
| Fam50b               | BC049659           | 0.0114799              | -1.5572                    |
| <b><u>Pik3r4</u></b> | NM_001081309       | 0.000323307            | -1.5657                    |
| Rrs1                 | NM_021511          | 0.0419897              | -1.5765                    |
| <b><u>Atp1a2</u></b> | NM_178405          | 0.0330287              | -1.5765                    |
| Cd84                 | NM_013489          | 0.0345877              | -1.5876                    |
| Skiv2l2              | NM_028151          | 0.0405212              | -1.6062                    |
| Skint9               | NM_177864          | 0.033784               | -1.6333                    |
| 100040328            | BC125243           | 0.0349371              | -1.6359                    |
| <b><u>Arg2</u></b>   | NM_009705          | 0.00417887             | -1.9331                    |
| Abhd14a              | NM_001110271       | 0.000283352            | -1.9900                    |
| Nme6                 | NM_018757          | 5.03E-05               | -2.1060                    |

References for the androgen-regulated genes (underlined with bold lettering) are as follow:  
Egr1 (5), Nr4a1 (2), Dio2 (7), Pik3r4 (4), Atp1a2 (1), and Arg2 (3, 6).

#### References

1. **Bolduc C, Yoshioka M, St-Amand J.** 2007. Transcriptomic characterization of the long-term dihydrotestosterone effects in adipose tissue. *Obesity (Silver Spring)* **15**:1107-1132.
2. **DePrimo SE, Diehn M, Nelson JB, Reiter RE, Matese J, Fero M, Tibshirani R, Brown PO, Brooks JD.** 2002. Transcriptional programs activated by exposure of human prostate cancer cells to androgen. *Genome Biol* **3**:RESEARCH0032.
3. **Doane AS, Danso M, Lal P, Donaton M, Zhang L, Hudis C, Gerald WL.** 2006. An estrogen receptor-negative breast cancer subset characterized by a hormonally regulated transcriptional program and response to androgen. *Oncogene* **25**:3994-4008.
4. **Nakamura Y, Suzuki T, Igarashi K, Kanno J, Furukawa T, Tazawa C, Fujishima F, Miura I, Ando T, Moriyama N, Moriya T, Saito H, Yamada S, Sasano H.** 2006. PTOV1: a novel testosterone-induced atherogenic gene in human aorta. *J Pathol* **209**:522-531.
5. **Seenundun S, Robaire B.** 2007. Time-dependent rescue of gene expression by androgens in the mouse proximal caput epididymidis-1 cell line after androgen withdrawal. *Endocrinology* **148**:173-188.
6. **Velasco AM, Gillis KA, Li Y, Brown EL, Sadler TM, Achilleos M, Greenberger LM, Frost P, Bai W, Zhang Y.** 2004. Identification and validation of novel androgen-regulated genes in prostate cancer. *Endocrinology* **145**:3913-3924.
7. **Xu Y, Chen SY, Ross KN, Balk SP.** 2006. Androgens induce prostate cancer cell proliferation through mammalian target of rapamycin activation and post-transcriptional increases in cyclin D proteins. *Cancer Res* **66**:7783-7792.



Table S3

Exon expression in *Stamp*<sup>tm/tm</sup> vs. *Stamp*<sup>+/+</sup> mice (heterogeneous background)

| Probeset ID | Gene Symbol | RefSeq       | p-value<br>(tm vs. wt) | Fold-Change<br>(tm vs. wt) |
|-------------|-------------|--------------|------------------------|----------------------------|
| 4751467     | Aass        | NM_013930    | 0.0044                 | 1.6499                     |
| 4440903     | Aass        | NM_013930    | 0.0075                 | 2.4676                     |
| 4823284     | Abcc9       | NM_011511    | 0.0312                 | 1.5015                     |
| 4541445     | Abcc9       | NM_011511    | 0.0257                 | 1.5186                     |
| 5404027     | Abcc9       | NM_011511    | 0.0375                 | 1.7343                     |
| 5268216     | Abhd14a     | NM_001110271 | 0.0000                 | -3.9236                    |
| 4911530     | Abhd14a     | NM_001110271 | 0.0017                 | -3.1288                    |
| 4360060     | Abhd14a     | NM_001110271 | 0.0213                 | -2.0310                    |
| 5072425     | Abhd14a     | NM_001110271 | 0.0021                 | -1.8991                    |
| 4911506     | Abhd14a     | NM_001110271 | 0.0215                 | -1.5229                    |
| 5117172     | Abhd14b     | NM_029631    | 0.0029                 | -1.7747                    |
| 4741366     | Abhd14b     | NM_029631    | 0.0043                 | -1.5114                    |
| 4508424     | Actr10      | NM_019785    | 0.0009                 | 2.7970                     |
| 4788397     | Actr10      | NM_019785    | 0.0002                 | 5.2431                     |
| 5109996     | Aebp1       | NM_009636    | 0.0119                 | -2.0086                    |
| 5289701     | Aebp1       | NM_009636    | 0.0130                 | -1.9654                    |
| 5051629     | Aim1        | NM_172393    | 0.0169                 | -1.7808                    |
| 5141257     | Aim1        | NM_172393    | 0.0224                 | -1.7248                    |
| 4874747     | Aim1        | NM_172393    | 0.0089                 | -1.6315                    |
| 5413918     | Aim1        | NM_172393    | 0.0041                 | -1.5324                    |
| 5195523     | Aim1        | NM_172393    | 0.0202                 | -1.5134                    |
| 5473432     | Aldoc       | NM_009657    | 0.0489                 | 1.5451                     |
| 5507902     | Aldoc       | NM_009657    | 0.0381                 | 1.5478                     |
| 4312708     | Ambp        | NM_007443    | 0.0047                 | -1.8619                    |
| 4768910     | Ambp        | NM_007443    | 0.0117                 | -1.5113                    |
| 4835853     | Aox3        | NM_023617    | 0.0134                 | -1.7547                    |
| 5203277     | Aox3        | NM_023617    | 0.0410                 | -1.5339                    |
| 5231363     | Arg2        | NM_009705    | 0.0210                 | -2.3489                    |
| 4669438     | Arg2        | NM_009705    | 0.0003                 | -2.3469                    |
| 4326852     | Arg2        | NM_009705    | 0.0144                 | -2.0613                    |
| 4700472     | Arg2        | NM_009705    | 0.0108                 | -1.9994                    |
| 5426092     | Arg2        | NM_009705    | 0.0052                 | -1.8019                    |
| 4399312     | Arg2        | NM_009705    | 0.0111                 | -1.7241                    |
| 4614993     | Arg2        | NM_009705    | 0.0273                 | -1.5960                    |
| 4955272     | Arhgap10    | NM_030113    | 0.0455                 | 1.5173                     |
| 5261476     | Arhgap10    | NM_030113    | 0.0242                 | 1.8473                     |
| 5544243     | Arhgap10    | NM_030113    | 0.0457                 | 1.9066                     |
| 5343547     | Arid4a      | NM_001081195 | 0.0233                 | 1.6158                     |
| 5533658     | Arid4a      | NM_001081195 | 0.0002                 | 1.9504                     |
| 4371745     | Atp1a2      | NM_178405    | 0.0236                 | -1.9250                    |
| 5548740     | Atp1a2      | NM_178405    | 0.0342                 | -1.7724                    |
| 4444569     | Atp1a2      | NM_178405    | 0.0088                 | -1.6802                    |
| 4697386     | Atp1a2      | NM_178405    | 0.0103                 | -1.6303                    |
| 4333902     | Atp1a2      | NM_178405    | 0.0139                 | -1.5937                    |
| 4583033     | Atp1a2      | NM_178405    | 0.0306                 | -1.5897                    |
| 4388347     | Atp1a2      | NM_178405    | 0.0318                 | -1.5587                    |
| 5152076     | Atp2c1      | NM_175025    | 0.0000                 | -7.2548                    |
| 4646835     | Atp2c1      | NM_175025    | 0.0002                 | -5.5705                    |
| 5232217     | Atp2c1      | NM_175025    | 0.0006                 | -2.0694                    |
| 4910351     | Atp2c1      | NM_175025    | 0.0013                 | -1.6045                    |

|         |          |              |        |         |
|---------|----------|--------------|--------|---------|
| 4964319 | Brip1    | NM_178309    | 0.0008 | -1.7361 |
| 4858095 | Brip1    | NM_178309    | 0.0037 | -1.6225 |
| 4947484 | Bst2     | NM_198095    | 0.0095 | 1.5255  |
| 5388370 | Btg2     | NM_007570    | 0.0111 | 1.8304  |
| 4393644 | Btg2     | NM_007570    | 0.0065 | 1.9193  |
| 4910411 | Btg2     | NM_007570    | 0.0430 | 2.0378  |
| 5043870 | Btg2     | NM_007570    | 0.0373 | 2.3563  |
| 4311249 | C3       | NM_009778    | 0.0258 | 1.5013  |
| 5061514 | C3       | NM_009778    | 0.0026 | 1.5137  |
| 4688264 | C3       | NM_009778    | 0.0177 | 1.5454  |
| 4831742 | Camkv    | NM_145621    | 0.0134 | 1.5345  |
| 4541781 | Camkv    | NM_145621    | 0.0321 | 1.6173  |
| 5299356 | Car5a    | NM_007608    | 0.0102 | -2.0401 |
| 5457062 | Car5a    | NM_007608    | 0.0301 | -1.5998 |
| 5202024 | Ccl22    | NM_009137    | 0.0161 | -1.6800 |
| 5398229 | Ccl22    | NM_009137    | 0.0269 | -1.5944 |
| 5273191 | Cd84     | NM_013489    | 0.0192 | -3.2824 |
| 5227163 | Cd84     | NM_013489    | 0.0315 | -3.0910 |
| 4847599 | Cd84     | NM_013489    | 0.0077 | -2.9040 |
| 4467596 | Cd84     | NM_013489    | 0.0467 | -1.7392 |
| 4885969 | Cds2     | NM_138651    | 0.0087 | 1.6140  |
| 4764913 | Cds2     | NM_138651    | 0.0316 | 1.6152  |
| 4967094 | Cln3     | NM_009907    | 0.0417 | 1.5064  |
| 5377189 | Cln3     | NM_009907    | 0.0013 | 1.5864  |
| 4456199 | Cln3     | NM_009907    | 0.0177 | 1.6932  |
| 4329022 | Cntn6    | NM_017383    | 0.0023 | -1.8250 |
| 5064768 | Cntn6    | NM_017383    | 0.0000 | -1.5156 |
| 5305164 | Col1a1   | NM_007742    | 0.0059 | 1.5206  |
| 4675817 | Col1a1   | NM_007742    | 0.0211 | 1.5503  |
| 5487434 | Col4a1   | NM_009931    | 0.0373 | 1.5012  |
| 4842375 | Col4a1   | NM_009931    | 0.0108 | 1.5361  |
| 5244098 | Cyb561d2 | NM_019720    | 0.0108 | -2.3645 |
| 4367176 | Cyb561d2 | NM_019720    | 0.0095 | -1.7649 |
| 5587878 | Cyb561d2 | NM_019720    | 0.0236 | -1.6757 |
| 4587980 | Cybb     | NM_007807    | 0.0241 | 1.8806  |
| 4539908 | Cybb     | NM_007807    | 0.0234 | 1.9761  |
| 4307066 | Dctd     | NM_178788    | 0.0045 | -1.6449 |
| 5220051 | Dctd     | NM_178788    | 0.0316 | -1.6248 |
| 4489098 | Dhx30    | NM_133347    | 0.0098 | -1.8938 |
| 5470760 | Dhx30    | NM_133347    | 0.0133 | -1.8055 |
| 5600686 | Dio2     | NM_010050    | 0.0243 | -2.0950 |
| 4618997 | Dio2     | NM_010050    | 0.0089 | -1.8462 |
| 4831505 | Dio2     | NM_010050    | 0.0334 | -1.6882 |
| 4621504 | Dio2     | NM_010050    | 0.0270 | -1.6822 |
| 4449671 | Dio2     | NM_010050    | 0.0322 | -1.6178 |
| 5307485 | Dio2     | NM_010050    | 0.0040 | -1.5196 |
| 5002622 | Dmkn     | NM_028618    | 0.0235 | -2.3406 |
| 4406765 | Dmkn     | NM_028618    | 0.0094 | -1.8169 |
| 4853726 | Dock11   | NM_001009947 | 0.0227 | 1.5456  |
| 4567308 | Dock11   | NM_001009947 | 0.0396 | 1.8095  |
| 4831067 | Dpp10    | NM_199021    | 0.0412 | -1.5868 |
| 5526715 | Dpp10    | NM_199021    | 0.0160 | -1.5801 |
| 4918416 | Efnb1    | NM_010110    | 0.0433 | 1.5121  |
| 4774302 | Efnb1    | NM_010110    | 0.0036 | 1.7120  |
| 5481286 | Efnb1    | NM_010110    | 0.0076 | 1.8010  |
| 4633715 | Egr1     | NM_007913    | 0.0219 | 2.3901  |

|         |         |                    |        |          |
|---------|---------|--------------------|--------|----------|
| 4412277 | Egr1    | NM_007913          | 0.0395 | 2.6521   |
| 4709728 | Egr1    | NM_007913          | 0.0290 | 2.7592   |
| 4472382 | Egr1    | NM_007913          | 0.0395 | 3.5151   |
| 4553204 | Egr1    | NM_007913          | 0.0428 | 3.6181   |
| 4635827 | Egr2    | NM_010118          | 0.0064 | 1.5281   |
| 4878614 | Egr2    | NM_010118          | 0.0391 | 2.0324   |
| 4547678 | Egr2    | NM_010118          | 0.0167 | 3.5843   |
| 4725158 | Eif2ak4 | NM_013719          | 0.0043 | -2.1714  |
| 5104557 | Eif2ak4 | NM_013719          | 0.0491 | -1.5673  |
| 5169104 | Eil3    | NM_145973          | 0.0470 | 1.5321   |
| 4912978 | Eil3    | NM_145973          | 0.0053 | 1.6504   |
| 4871386 | Errfi1  | NM_133753          | 0.0015 | 1.5635   |
| 4605188 | Errfi1  | NM_133753          | 0.0369 | 1.6257   |
| 5092523 | Errfi1  | NM_133753          | 0.0041 | 1.7100   |
| 4974656 | Ets2    | NM_011809          | 0.0156 | 1.6988   |
| 5249764 | Ets2    | NM_011809          | 0.0190 | 2.2692   |
| 4919666 | Evc     | NM_021292          | 0.0391 | 1.5372   |
| 4535163 | Evc     | ENSMUST00000031005 | 0.0281 | 1.5579   |
| 5597854 | Fads1   | NM_146094          | 0.0097 | 1.5388   |
| 5388214 | Fads1   | NM_146094          | 0.0110 | 1.5530   |
| 4603321 | Fads1   | NM_146094          | 0.0093 | 1.7191   |
| 5609745 | Fam179b | BC062107           | 0.0009 | 2.0211   |
| 4752600 | Fam179b | BC062107           | 0.0001 | 2.8900   |
| 4575462 | Fam55b  | NM_030069          | 0.0245 | -2.6160  |
| 4615407 | Fam55b  | NM_030069          | 0.0091 | -1.9596  |
| 5008371 | Fbxw15  | NM_199036          | 0.0018 | 1.7686   |
| 5376845 | Fbxw15  | NM_199036          | 0.0269 | 1.8558   |
| 5419197 | Fmn2    | NM_019445          | 0.0078 | -2.9024  |
| 4667571 | Fmn2    | NM_019445          | 0.0123 | -2.0468  |
| 5023048 | Fos     | NM_010234          | 0.0337 | 1.9965   |
| 4482940 | Fos     | NM_010234          | 0.0424 | 2.3030   |
| 4817672 | Fos     | NM_010234          | 0.0001 | 2.8461   |
| 5039558 | Fosl2   | NM_008037          | 0.0301 | 1.5358   |
| 4473106 | Fosl2   | NM_008037          | 0.0395 | 1.6513   |
| 5035400 | Gad2    | NM_008078          | 0.0068 | -1.7199  |
| 5292148 | Gad2    | NM_008078          | 0.0413 | -1.7178  |
| 4825369 | Gldc    | NM_138595          | 0.0021 | -1.5176  |
| 4551799 | Gldc    | NM_138595          | 0.0044 | -1.5110  |
| 5225793 | Gpr98   | NM_054053          | 0.0234 | -2.3392  |
| 4364879 | Gpr98   | NM_054053          | 0.0221 | -1.5093  |
| 5166989 | Hdac9   | NM_024124          | 0.0040 | 1.5199   |
| 4360319 | Hdac9   | NM_024124          | 0.0443 | 1.5830   |
| 4394303 | Hdac9   | NM_024124          | 0.0014 | 1.8494   |
| 5386721 | Hdac9   | NM_024124          | 0.0204 | 1.9169   |
| 4732540 | Hdac9   | NM_024124          | 0.0012 | 2.9759   |
| 5200689 | Hemk1   | ENSMUST00000035196 | 0.0002 | -13.1269 |
| 4636919 | Hemk1   | NM_133984          | 0.0000 | -2.7666  |
| 5353821 | Hlcs    | NM_139145          | 0.0016 | -2.0363  |
| 4496352 | Hlcs    | NM_139145          | 0.0448 | 1.5488   |
| 4981703 | Hsdl1   | NM_175185          | 0.0306 | -1.6374  |
| 5322165 | Hsdl1   | NM_175185          | 0.0051 | -1.5206  |
| 4797123 | Hspa12a | NM_175199          | 0.0449 | 1.5008   |
| 5281567 | Hspa12a | NM_175199          | 0.0408 | 1.5055   |
| 5016366 | Hspa12a | NM_175199          | 0.0487 | 1.6247   |
| 4743480 | Ier2    | NM_010499          | 0.0470 | 1.6481   |
| 5506490 | Ier2    | NM_010499          | 0.0271 | 2.1043   |

|         |         |           |        |         |
|---------|---------|-----------|--------|---------|
| 5183781 | ler3    | NM_133662 | 0.0059 | 1.6312  |
| 5320610 | ler3    | NM_133662 | 0.0144 | 2.0055  |
| 4442739 | lgf2bp1 | NM_009951 | 0.0058 | -1.6735 |
| 4431559 | lgf2bp1 | NM_009951 | 0.0325 | -1.6626 |
| 4944486 | lgh     | AY769940  | 0.0304 | 1.5646  |
| 4448286 | lgh     | AY769940  | 0.0060 | 1.9512  |
| 4688427 | ll1b    | NM_008361 | 0.0064 | 1.5418  |
| 4611184 | ll1b    | NM_008361 | 0.0167 | 1.8925  |
| 4425868 | ll31ra  | NM_139299 | 0.0192 | -4.4742 |
| 4577352 | ll31ra  | NM_139299 | 0.0191 | -2.5034 |
| 5044783 | ll31ra  | NM_139299 | 0.0206 | -2.4730 |
| 5330618 | ll31ra  | NM_139299 | 0.0038 | -2.0964 |
| 5055062 | ll31ra  | NM_139299 | 0.0091 | -1.9376 |
| 5107516 | ltih2   | NM_010582 | 0.0311 | 1.5943  |
| 4569424 | ltih2   | NM_010582 | 0.0326 | 2.1981  |
| 4820938 | ltpr3   | NM_080553 | 0.0001 | 1.5429  |
| 4979886 | ltpr3   | NM_080553 | 0.0398 | 1.7882  |
| 5208488 | Kcnh5   | NM_172805 | 0.0245 | 1.9316  |
| 4433106 | Kcnh5   | NM_172805 | 0.0069 | 2.0338  |
| 4878981 | Kcnh5   | NM_172805 | 0.0143 | 2.9720  |
| 5079906 | Kcnh5   | NM_172805 | 0.0053 | 3.0585  |
| 5079913 | Kcnj9   | NM_008429 | 0.0474 | -2.1300 |
| 4485754 | Kcnj9   | NM_008429 | 0.0056 | -1.6900 |
| 4396536 | Klc1    | NM_008450 | 0.0078 | 1.5053  |
| 4581312 | Klc1    | NM_008450 | 0.0003 | 2.0191  |
| 4925169 | Kremen1 | NM_032396 | 0.0265 | 1.5328  |
| 4963369 | Kremen1 | NM_032396 | 0.0292 | 1.5537  |
| 4934064 | Kremen1 | NM_032396 | 0.0360 | 1.6811  |
| 5204538 | Kremen1 | NM_032396 | 0.0170 | 1.8944  |
| 5584409 | Kremen1 | NM_032396 | 0.0162 | 2.0055  |
| 4656189 | Lcat    | NM_008490 | 0.0021 | 1.6493  |
| 4367597 | Lcat    | NM_008490 | 0.0031 | 1.7912  |
| 4351512 | Ldlr    | NM_010700 | 0.0284 | 1.6060  |
| 5349710 | Ldlr    | NM_010700 | 0.0204 | 1.8019  |
| 4551856 | Ldlr    | NM_010700 | 0.0103 | 1.9303  |
| 4855807 | Ldlr    | NM_010700 | 0.0051 | 2.2116  |
| 5167144 | Lipi    | NM_177142 | 0.0085 | -1.7822 |
| 5241955 | Lipi    | NM_177142 | 0.0472 | -1.6396 |
| 4822961 | Lipi    | NM_177142 | 0.0497 | -1.6093 |
| 5214540 | Lrrc9   | NM_030070 | 0.0177 | 2.1225  |
| 5525389 | Lrrc9   | NM_030070 | 0.0005 | 2.4776  |
| 5530449 | Ltbp3   | NM_008520 | 0.0446 | 1.6727  |
| 4829966 | Ltbp3   | NM_008520 | 0.0032 | 1.7260  |
| 5076963 | Mdga2   | NM_207010 | 0.0147 | 2.0539  |
| 4837059 | Mdga2   | NM_207010 | 0.0015 | 2.0729  |
| 5214695 | Mdga2   | NM_207010 | 0.0085 | 2.1283  |
| 4787321 | Mdga2   | NM_207010 | 0.0088 | 2.3045  |
| 5055785 | Mdga2   | NM_207010 | 0.0082 | 2.4034  |
| 5572526 | Mdga2   | NM_207010 | 0.0131 | 3.6136  |
| 5530966 | Mdga2   | NM_207010 | 0.0005 | 4.0573  |
| 4607820 | Mfap4   | NM_029568 | 0.0078 | 1.5591  |
| 5136672 | Mfap4   | NM_029568 | 0.0286 | 1.5815  |
| 4355563 | Mpped1  | NM_172610 | 0.0017 | -1.8555 |
| 5179960 | Mpped1  | NM_172610 | 0.0241 | -1.6763 |
| 5302988 | Mrpl3   | NM_053159 | 0.0006 | -2.2936 |
| 4806804 | Mrpl3   | NM_053159 | 0.0009 | -2.0486 |

|         |         |              |        |         |
|---------|---------|--------------|--------|---------|
| 5224534 | Mtmt7   | NM_001040699 | 0.0424 | -1.8238 |
| 4925189 | Mtmt7   | NM_001040699 | 0.0411 | -1.7611 |
| 4692954 | Mtmt7   | NM_001040699 | 0.0023 | -1.7585 |
| 4841113 | Mtus1   | NM_001005863 | 0.0070 | -2.3867 |
| 4821504 | Mtus1   | NM_001005863 | 0.0025 | -1.7176 |
| 5589750 | Nek11   | NM_172461    | 0.0011 | -2.5582 |
| 5267972 | Nek11   | NM_172461    | 0.0029 | -2.1129 |
| 4640151 | Nme6    | NM_018757    | 0.0001 | -6.8734 |
| 5266395 | Nme6    | NM_018757    | 0.0007 | -4.7395 |
| 5591035 | Nme6    | NM_018757    | 0.0029 | -1.9171 |
| 5456404 | Nme6    | NM_018757    | 0.0098 | -1.8448 |
| 4916172 | Nphp3   | NM_028721    | 0.0002 | -1.7335 |
| 5585350 | Nphp3   | NM_028721    | 0.0477 | -1.6846 |
| 5080993 | Nphp3   | NM_028721    | 0.0256 | -1.6653 |
| 5162776 | Nr4a1   | NM_010444    | 0.0320 | 1.5226  |
| 5107194 | Nr4a1   | NM_010444    | 0.0010 | 1.5620  |
| 5508765 | Nr4a1   | NM_010444    | 0.0015 | 1.6713  |
| 4352254 | Nr4a1   | NM_010444    | 0.0015 | 1.7857  |
| 5171752 | Nr4a1   | NM_010444    | 0.0346 | 2.2302  |
| 5448768 | Nrxn3   | NM_172544    | 0.0002 | 7.0601  |
| 4996321 | Nrxn3   | AK129205     | 0.0009 | 7.1023  |
| 4900563 | Nrxn3   | NM_172544    | 0.0090 | 11.2823 |
| 4744864 | Oasl1   | NM_145209    | 0.0449 | 1.5208  |
| 4422883 | Oasl1   | NM_145209    | 0.0349 | 1.6041  |
| 4647838 | Oma1    | NM_025909    | 0.0146 | -1.6603 |
| 5335709 | Oma1    | NM_025909    | 0.0010 | -1.5571 |
| 4384290 | Osbp10  | NM_148958    | 0.0224 | -1.5750 |
| 4916092 | Osbp10  | NM_148958    | 0.0010 | -1.5513 |
| 5484683 | Osmr    | NM_011019    | 0.0399 | -1.5692 |
| 4433842 | Osmr    | NM_011019    | 0.0394 | -1.5451 |
| 5491177 | Oxsr1   | NM_133985    | 0.0036 | -3.2265 |
| 5588618 | Oxsr1   | NM_133985    | 0.0089 | -1.6914 |
| 4817880 | Oxsr1   | NM_133985    | 0.0080 | -1.5758 |
| 4626739 | Pcnt    | NM_008787    | 0.0259 | -1.7125 |
| 5006489 | Pcnt    | NM_008787    | 0.0475 | -1.6011 |
| 4542406 | Pcnt    | NM_008787    | 0.0011 | -1.5487 |
| 5298818 | Pde2a   | NM_001008548 | 0.0322 | 1.6770  |
| 4384093 | Pde2a   | NM_001008548 | 0.0435 | 1.6800  |
| 5009688 | Pik3r4  | NM_001081309 | 0.0010 | -4.1297 |
| 4380081 | Pik3r4  | NM_001081309 | 0.0035 | -2.3351 |
| 5449499 | Pik3r4  | NM_001081309 | 0.0033 | -2.2369 |
| 5409661 | Pik3r4  | NM_001081309 | 0.0006 | -1.7440 |
| 4784867 | Pkhd11l | NM_138674    | 0.0145 | -1.6839 |
| 5071477 | Pkhd11l | NM_138674    | 0.0322 | -1.5840 |
| 5600538 | Plk3    | NM_013807    | 0.0242 | 1.7348  |
| 4574474 | Plk3    | NM_013807    | 0.0288 | 1.7787  |
| 4628195 | Plk3    | NM_013807    | 0.0088 | 1.9708  |
| 5003873 | Plk3    | NM_013807    | 0.0226 | 2.1400  |
| 4816434 | Prkch   | NM_008856    | 0.0241 | 1.5011  |
| 5215818 | Prkch   | NM_008856    | 0.0259 | 1.6145  |
| 5494239 | Prkch   | NM_008856    | 0.0082 | 1.6903  |
| 4787816 | Prkch   | NM_008856    | 0.0323 | 1.8114  |
| 5544549 | Prkch   | NM_008856    | 0.0093 | 1.8216  |
| 4981142 | Prkch   | NM_008856    | 0.0067 | 1.9491  |
| 5385984 | Prkch   | NM_008856    | 0.0092 | 2.0750  |
| 4442130 | Prmt3   | NM_133740    | 0.0449 | -1.7539 |

|         |           |              |        |         |
|---------|-----------|--------------|--------|---------|
| 4667366 | Prmt3     | NM_133740    | 0.0422 | -1.6845 |
| 4639590 | Prps11l   | NM_029294    | 0.0230 | 1.5149  |
| 4803272 | Prps11l   | NM_029294    | 0.0001 | 3.3324  |
| 4594315 | Prps11l   | NM_029294    | 0.0000 | 3.5535  |
| 5282734 | Prps11l   | NM_029294    | 0.0000 | 12.5184 |
| 4997955 | Ptprv     | NM_007955    | 0.0237 | 1.5013  |
| 5614202 | Ptprv     | NM_007955    | 0.0265 | 1.5115  |
| 5126444 | Ptprv     | NM_007955    | 0.0365 | 1.5542  |
| 4912408 | Ptprv     | NM_007955    | 0.0122 | 1.6057  |
| 4899898 | Ptprv     | NM_007955    | 0.0361 | 1.6898  |
| 5018388 | Ptprv     | NM_007955    | 0.0398 | 1.8946  |
| 5007225 | Ptprv     | NM_007955    | 0.0105 | 1.9382  |
| 5297896 | Rbm34     | BC141278     | 0.0174 | -1.5843 |
| 5278082 | Rbm34     | BC141278     | 0.0252 | -1.5057 |
| 4543600 | Ren1      | NM_031192    | 0.0175 | 1.5600  |
| 4819988 | Ren1      | NM_031192    | 0.0076 | 1.6937  |
| 5502779 | Ren1      | NM_031192    | 0.0469 | 1.7025  |
| 4436804 | Ren1      | NM_031192    | 0.0066 | 1.8504  |
| 4985101 | Rhbg      | NM_021375    | 0.0090 | 1.5212  |
| 4325268 | Rhbg      | NM_021375    | 0.0132 | 1.6294  |
| 4520569 | Rhbg      | NM_021375    | 0.0077 | 1.7223  |
| 4673247 | Rhbg      | NM_021375    | 0.0088 | 2.1608  |
| 5375125 | Rhbg      | NM_021375    | 0.0052 | 2.7416  |
| 4998598 | Rhoj      | NM_023275    | 0.0050 | 1.5852  |
| 5007797 | Rhoj      | NM_023275    | 0.0117 | 1.6489  |
| 4536105 | Ros1      | NM_011282    | 0.0088 | -2.2717 |
| 4361020 | Ros1      | NM_011282    | 0.0345 | -1.9340 |
| 4601648 | Ros1      | NM_011282    | 0.0421 | -1.5623 |
| 4501914 | Rrp9      | NM_145620    | 0.0193 | 1.5391  |
| 4542085 | Rrp9      | NM_145620    | 0.0049 | 1.5610  |
| 4559932 | Runx1t1   | NM_001111027 | 0.0361 | 1.6960  |
| 4554099 | Runx1t1   | NM_001111027 | 0.0240 | 1.7428  |
| 4541863 | Sc4mol    | NM_025436    | 0.0391 | 1.8174  |
| 4654742 | Sc4mol    | NM_025436    | 0.0177 | 1.8939  |
| 5542026 | Scn10a    | NM_009134    | 0.0093 | 1.5942  |
| 4828569 | Scn10a    | NM_009134    | 0.0094 | 1.7227  |
| 5048216 | Scn10a    | NM_009134    | 0.0035 | 1.7494  |
| 5431911 | Scn10a    | NM_009134    | 0.0213 | 1.9999  |
| 5228712 | Scn10a    | NM_009134    | 0.0119 | 2.0188  |
| 5167380 | Scn10a    | NM_009134    | 0.0019 | 2.0688  |
| 5058843 | Scn10a    | NM_009134    | 0.0038 | 2.1030  |
| 5419137 | Scn10a    | NM_009134    | 0.0156 | 2.1208  |
| 5604888 | Scn10a    | NM_009134    | 0.0104 | 2.2061  |
| 4792561 | Scn10a    | NM_009134    | 0.0167 | 2.2811  |
| 5177475 | Scn10a    | NM_009134    | 0.0381 | 2.3350  |
| 4546867 | Scn10a    | NM_009134    | 0.0005 | 2.4861  |
| 5306380 | Scn10a    | NM_009134    | 0.0030 | 2.4950  |
| 5299585 | Scn10a    | NM_009134    | 0.0067 | 2.6099  |
| 4750224 | Scn10a    | NM_009134    | 0.0080 | 2.6825  |
| 4627217 | Scn10a    | NM_009134    | 0.0004 | 3.0579  |
| 5105079 | Scn10a    | NM_009134    | 0.0008 | 4.7551  |
| 4332069 | Serpina3b | NM_173024    | 0.0365 | 2.0109  |
| 5235953 | Serpina3b | NM_173024    | 0.0245 | 2.1309  |
| 5026816 | Serpina3b | NM_173024    | 0.0137 | 2.6284  |
| 5558661 | Serpina3c | NM_008458    | 0.0059 | 1.6278  |
| 5485765 | Serpina3c | NM_008458    | 0.0311 | 1.6754  |

|         |           |              |        |         |
|---------|-----------|--------------|--------|---------|
| 4618503 | Serpina3c | NM_008458    | 0.0041 | 1.7340  |
| 5137940 | Serpina3c | NM_008458    | 0.0214 | 1.8798  |
| 5056290 | Serpina3g | NM_009251    | 0.0005 | 19.3028 |
| 5164692 | Serpina3g | NM_009251    | 0.0011 | 29.7838 |
| 4548401 | Serpina3g | NM_009251    | 0.0002 | 36.0794 |
| 5412356 | Serpina3g | NM_009251    | 0.0002 | 68.8566 |
| 5068241 | Shisa5    | NM_025858    | 0.0159 | 1.5457  |
| 4772547 | Shisa5    | NM_025858    | 0.0070 | 1.5565  |
| 5358275 | Skiv2l2   | NM_028151    | 0.0115 | -2.1033 |
| 4465141 | Skiv2l2   | NM_028151    | 0.0337 | -1.8354 |
| 4532266 | Skiv2l2   | NM_028151    | 0.0304 | -1.8141 |
| 4937215 | Skiv2l2   | NM_028151    | 0.0274 | -1.7771 |
| 5480719 | Skiv2l2   | NM_028151    | 0.0391 | -1.7386 |
| 5171862 | Skiv2l2   | NM_028151    | 0.0420 | -1.5359 |
| 5248840 | Slamf7    | AF467910     | 0.0015 | -1.5980 |
| 5013425 | Slamf7    | NM_144539    | 0.0142 | -1.5537 |
| 4834977 | Slc25a41  | NM_175333    | 0.0056 | -1.6202 |
| 5349653 | Slc25a41  | NM_175333    | 0.0205 | -1.5268 |
| 4505552 | Slc38a1   | NM_134086    | 0.0249 | 1.6473  |
| 4396157 | Slc38a1   | NM_134086    | 0.0079 | 1.6700  |
| 4788862 | Slc38a1   | NM_134086    | 0.0231 | 1.8017  |
| 5584308 | Slc38a1   | NM_134086    | 0.0404 | 1.8150  |
| 4524409 | Slc38a1   | NM_134086    | 0.0071 | 2.2207  |
| 4475568 | Slc38a1   | BC030378     | 0.0127 | 2.3257  |
| 4801170 | Slc39a14  | NM_001135151 | 0.0445 | 1.5356  |
| 4872559 | Slc39a14  | NM_144808    | 0.0387 | 1.5497  |
| 5032815 | Slc47a1   | NM_026183    | 0.0487 | 1.7224  |
| 4435810 | Slc47a1   | NM_026183    | 0.0293 | 2.3344  |
| 4558089 | Slc7a2    | NM_007514    | 0.0494 | 1.5352  |
| 4733328 | Slc7a2    | NM_007514    | 0.0074 | 1.6535  |
| 4659514 | Slc7a2    | NM_007514    | 0.0286 | 1.8354  |
| 5444364 | Slc7a2    | NM_001044740 | 0.0120 | 2.2734  |
| 5342105 | Slit2     | NM_178804    | 0.0248 | 1.5028  |
| 4443690 | Slit2     | NM_178804    | 0.0476 | 2.2153  |
| 5449671 | Snapc1    | NM_178392    | 0.0100 | 1.5081  |
| 4321446 | Snapc1    | NM_178392    | 0.0195 | 1.5260  |
| 4757183 | Snapc1    | NM_178392    | 0.0246 | 1.9210  |
| 4652625 | Snapc1    | NM_178392    | 0.0428 | 2.0663  |
| 4540472 | Snapc1    | NM_178392    | 0.0093 | 2.1420  |
| 4632246 | Snapc1    | NM_178392    | 0.0023 | 3.0615  |
| 4626991 | Speg      | NM_007463    | 0.0385 | -1.6173 |
| 4382286 | Speg      | NM_007463    | 0.0201 | -1.5326 |
| 4881642 | Spna1     | NM_011465    | 0.0231 | -2.4531 |
| 5144376 | Spna1     | NM_011465    | 0.0202 | -1.5336 |
| 5354575 | Spna1     | NM_011465    | 0.0012 | -1.5204 |
| 5615852 | Ston2     | NM_175367    | 0.0044 | 1.7475  |
| 5305623 | Ston2     | NM_175367    | 0.0044 | 2.4873  |
| 5392356 | Ston2     | NM_175367    | 0.0003 | 2.4973  |
| 5536819 | Ston2     | NM_175367    | 0.0002 | 2.8443  |
| 4384629 | Ston2     | NM_175367    | 0.0001 | 3.3409  |
| 4742865 | Ston2     | NM_175367    | 0.0000 | 3.5043  |
| 4337648 | Susd4     | NM_144796    | 0.0386 | 1.6608  |
| 5477803 | Susd4     | NM_144796    | 0.0137 | 1.7426  |
| 5213391 | Tbc1d9    | NM_001111304 | 0.0483 | -3.8200 |
| 4988514 | Tbc1d9    | NM_001111304 | 0.0194 | -2.3048 |
| 4361236 | Tbc1d9    | NM_001111304 | 0.0472 | -1.5261 |

|         |         |              |        |           |
|---------|---------|--------------|--------|-----------|
| 5001750 | Tdgf1   | NM_011562    | 0.0151 | 1.5671    |
| 5395477 | Tdgf1   | NM_011562    | 0.0003 | 3.3826    |
| 5581960 | Tep1    | NM_009351    | 0.0025 | 1.5192    |
| 5081236 | Tep1    | NM_009351    | 0.0116 | 1.6514    |
| 5314083 | Tep1    | NM_009351    | 0.0156 | 1.6570    |
| 5510886 | Tg      | NM_009375    | 0.0135 | 1.5548    |
| 5574802 | Tg      | NM_009375    | 0.0050 | 1.6233    |
| 4924122 | Tgfb1   | NM_009369    | 0.0289 | -2.1934   |
| 4991317 | Tgfb1   | NM_009369    | 0.0374 | -1.7245   |
| 5132665 | Thbs1   | NM_011580    | 0.0229 | 1.5431    |
| 5043600 | Thbs1   | NM_011580    | 0.0143 | 1.5523    |
| 4930654 | Thbs1   | NM_011580    | 0.0001 | 1.6976    |
| 4876471 | Thbs1   | NM_011580    | 0.0088 | 1.7749    |
| 4415786 | Thbs1   | NM_011580    | 0.0204 | 1.9168    |
| 5489953 | Tm7sf2  | NM_028454    | 0.0269 | 1.5526    |
| 5018268 | Tm7sf2  | NM_028454    | 0.0049 | 1.5994    |
| 5208861 | Tmem115 | NM_019704    | 0.0005 | -3.6430   |
| 4552879 | Tmem115 | NM_019704    | 0.0004 | -2.3682   |
| 5335926 | Tmem115 | NM_019704    | 0.0051 | -2.3015   |
| 5117626 | Tmem195 | NM_178767    | 0.0366 | -1.8642   |
| 5465191 | Tmem195 | NM_178767    | 0.0384 | -1.5435   |
| 5566585 | Trf     | NM_133977    | 0.0293 | 1.5104    |
| 4967444 | Trf     | NM_133977    | 0.0234 | 1.8344    |
| 5483671 | Tshr    | NM_011648    | 0.0053 | 2.5717    |
| 5158199 | Tshr    | NM_011648    | 0.0020 | 4.0380    |
| 4448089 | Tshr    | NM_011648    | 0.0001 | 4.0838    |
| 5107271 | Tshr    | NM_011648    | 0.0001 | 4.6690    |
| 4633870 | Tshr    | NM_011648    | 0.0003 | 5.0876    |
| 4554444 | Tshr    | NM_011648    | 0.0005 | 5.4078    |
| 4873088 | Tshr    | NM_011648    | 0.0001 | 6.5580    |
| 4387335 | Tshr    | NM_011648    | 0.0005 | 6.7299    |
| 5418436 | Tshr    | NM_011648    | 0.0001 | 7.6667    |
| 5201129 | Tshr    | NM_011648    | 0.0001 | 8.7363    |
| 5454201 | Tshr    | NM_011648    | 0.0003 | 14.0402   |
| 4537529 | Till5   | NM_001081423 | 0.0000 | -294.7200 |
| 4927582 | Till5   | NM_001081423 | 0.0000 | -77.2434  |
| 5537053 | Till5   | NM_001081423 | 0.0005 | -3.4252   |
| 5578115 | Till5   | NM_001081423 | 0.0032 | -3.1844   |
| 4848712 | Till5   | NM_001081423 | 0.0000 | -2.9590   |
| 5094849 | Till5   | NM_001081423 | 0.0001 | -2.6842   |
| 4968626 | Till5   | NM_001081423 | 0.0000 | -2.6304   |
| 5029446 | Till5   | NM_001081423 | 0.0004 | -2.5933   |
| 5243391 | Till5   | NM_001081423 | 0.0002 | -2.5882   |
| 5521171 | Till5   | NM_001081423 | 0.0000 | -2.5769   |
| 5143384 | Till5   | NM_001081423 | 0.0005 | -2.5703   |
| 5583780 | Till5   | NM_001081423 | 0.0001 | -2.5477   |
| 4705831 | Till5   | NM_001081423 | 0.0012 | -2.5202   |
| 5246111 | Till5   | NM_001081423 | 0.0006 | -2.4674   |
| 5470722 | Till5   | NM_001081423 | 0.0000 | -2.4597   |
| 4463019 | Till5   | NM_001081423 | 0.0000 | -2.3739   |
| 4650362 | Till5   | NM_001081423 | 0.0000 | -2.3682   |
| 4615781 | Till5   | NM_001081423 | 0.0003 | -2.3646   |
| 5345141 | Till5   | NM_001081423 | 0.0006 | -2.3509   |
| 5043453 | Till5   | NM_001081423 | 0.0000 | -2.3348   |
| 5568898 | Till5   | NM_001081423 | 0.0000 | -2.2475   |
| 4668068 | Till5   | NM_001081423 | 0.0000 | -2.2417   |



|         |         |              |        |         |
|---------|---------|--------------|--------|---------|
| 4901858 | Till5   | NM_001081423 | 0.0001 | -2.2157 |
| 5214808 | Till5   | NM_001081423 | 0.0019 | -2.2069 |
| 4311000 | Till5   | NM_001081423 | 0.0001 | -2.2013 |
| 4584716 | Till5   | NM_001081423 | 0.0008 | -2.1792 |
| 5321377 | Till5   | NM_001081423 | 0.0004 | -2.1587 |
| 4612994 | Till5   | NM_001081423 | 0.0000 | -2.1409 |
| 5597974 | Till5   | NM_001081423 | 0.0000 | -2.1264 |
| 4844608 | Till5   | NM_001081423 | 0.0000 | -2.1223 |
| 5217313 | Till5   | NM_001081423 | 0.0000 | -2.0859 |
| 5298531 | Till5   | NM_001081423 | 0.0001 | -2.0536 |
| 4840494 | Till5   | NM_001081423 | 0.0004 | -1.7447 |
| 5328781 | Tusc4   | NM_018879    | 0.0143 | -1.7293 |
| 4879223 | Tusc4   | NM_018879    | 0.0041 | -1.7086 |
| 4664072 | Tusc4   | NM_018879    | 0.0032 | -1.6198 |
| 4998263 | Vash1   | NM_177354    | 0.0291 | 1.5300  |
| 4840147 | Vash1   | NM_177354    | 0.0065 | 2.1015  |
| 4728940 | Vav1    | NM_011691    | 0.0116 | -1.8970 |
| 4404873 | Vav1    | NM_011691    | 0.0028 | -1.5241 |
| 4393622 | Vcam1   | NM_011693    | 0.0433 | 1.6550  |
| 5130024 | Vcam1   | NM_011693    | 0.0102 | 1.6583  |
| 4902444 | Vcam1   | NM_011693    | 0.0344 | 1.7843  |
| 5226082 | Vsig8   | NM_177723    | 0.0094 | -1.8971 |
| 5002756 | Vsig8   | NM_177723    | 0.0039 | -1.6401 |
| 5252446 | Vsig8   | NM_177723    | 0.0006 | -1.5249 |
| 5103173 | Xdh     | NM_011723    | 0.0014 | 1.5644  |
| 4375137 | Xdh     | NM_011723    | 0.0132 | 1.6636  |
| 4503296 | Zan     | NM_011741    | 0.0222 | 1.5361  |
| 5158219 | Zan     | NM_011741    | 0.0373 | 1.7452  |
| 5274543 | Zfp276  | NM_020497    | 0.0192 | 1.5006  |
| 5324011 | Zfp276  | NM_020497    | 0.0164 | 1.6763  |
| 5170814 | Zfp36   | NM_011756    | 0.0363 | 1.9534  |
| 5274055 | Zfp36   | NM_011756    | 0.0115 | 2.1201  |
| 4707402 | Zfp69   | NM_001005788 | 0.0304 | -1.7990 |
| 5283062 | Zfp69   | NM_001005788 | 0.0112 | -1.5286 |
| 5334924 | Zfp760  | NM_001008501 | 0.0213 | -1.6500 |
| 4374330 | Zfp760  | NM_001008501 | 0.0482 | -1.5107 |
| 5276329 | Zmynd10 | NM_053253    | 0.0008 | -2.1616 |
| 4983933 | Zmynd10 | NM_053253    | 0.0007 | -1.5546 |

Table S4

Abundance of transcribed STAMP exons (from chromosome 12) in TM vs WT mice

| Exon | Probe<br>Start (bp) | Probe<br>Stop (bp) | Probeset<br>ID | Exon id | Alternative<br>splicing | TM vs. WT      |             |
|------|---------------------|--------------------|----------------|---------|-------------------------|----------------|-------------|
|      |                     |                    |                |         |                         | Fold<br>change | p value     |
| 1    |                     |                    |                |         |                         |                |             |
| 2    | 87167527            | 87167557           | 5143384        | 175785  | 0                       | -2.570         | 0.000457976 |
| 3    | 87172898            | 87172950           | 5217313        | 175786  | 0                       | -2.086         | 4.99E-06    |
| 4    | 87184747            | 87184799           | 4584716        | 175789  | 0                       | -2.179         | 0.00078782  |
| 5    | 87186211            | 87186279           | 4968626        | 175790  | 0                       | -2.630         | 4.25E-05    |
| 6    | 87190207            | 87190270           | 5597974        | 175791  | 0                       | -2.126         | 2.91E-06    |
| 7    | 87198330            | 87198412           | 5246111        | 175795  | 0                       | -2.467         | 0.000613607 |
| 8    |                     |                    |                |         |                         |                |             |
| 9    | 87205477            | 87205524           | 4612994        | 175798  | 0                       | -2.141         | 1.59E-05    |
| 10   | 87217444            | 87217518           | 4668068        | 175804  | 0                       | -2.242         | 4.01E-05    |
| 11   | 87219351            | 87219411           | 5243391        | 175805  | 0                       | -2.588         | 0.000205778 |
| 12   | 87220334            | 87220425           | 4844608        | 175806  | 0                       | -2.122         | 4.63E-05    |
| 13   | 87230123            | 87230174           | 4650362        | 175811  | 0                       | -2.368         | 3.50E-05    |
| 14   | 87231971            | 87232007           | 5094849        | 175812  | 0                       | -2.684         | 0.000128215 |
| 15   | 87233078            | 87233152           | 5043453        | 175813  | 0                       | -2.335         | 4.81E-05    |
| 16   | 87239973            | 87239999           | 5578115        | 175816  | 0                       | -3.184         | 0.0031963   |
| 16   | 87240018            | 87240053           | 4901858        | 175816  | 0                       | -2.216         | 0.000106575 |
| 17   | 87240360            | 87240428           | 4705831        | 175817  | 0                       | -2.520         | 0.00124771  |
| 18   | 87249755            | 87249805           | 5568898        | 175818  | 0                       | -2.247         | 3.78E-06    |
| 19   |                     |                    |                |         |                         |                |             |
| 20   | 87258643            | 87258718           | 5583780        | 175821  | 0                       | -2.548         | 6.66E-05    |
| 21   | 87260018            | 87260187           | 4840494        | 175823  | 0                       | -1.745         | 0.000402903 |
| 22   | 87263912            | 87263982           | 5298531        | 175825  | 0                       | -2.054         | 5.15E-05    |
| 23   | 87266598            | 87266709           | 4927582        | 175826  | 0                       | -77.243        | 1.27E-06    |
| 24   | 87267808            | 87267855           | 4537529        | 175827  | 0                       | 294.720        | 4.76E-08    |
| 25   | 87270824            | 87270941           | 5345141        | 175829  | 0                       | -2.351         | 0.00058593  |
| 26   | 87273676            | 87273758           | 4311000        | 175831  | 0                       | -2.201         | 0.000115646 |
| 27   | 87274245            | 87274361           | 5214808        | 175832  | 0                       | -2.207         | 0.00192857  |
| 27   | 87274498            | 87274593           | 5321377        | 175832  | 0                       | -2.159         | 0.000352234 |
| 28   | 87280329            | 87280408           | 4615781        | 175834  | 0                       | -2.365         | 0.000323571 |
| 29   | 87297580            | 87297650           | 5470722        | 175838  | 0                       | -2.460         | 1.19E-05    |
| 30   | 87336982            | 87337145           | 4463019        | 175849  | 0                       | -2.374         | 4.66E-05    |
| 31   | 87353598            | 87353642           | 4848712        | 175855  | 0                       | -2.959         | 1.02E-05    |
| 31   | 87353718            | 87353809           | 5521171        | 175855  | 0                       | -2.577         | 4.82E-05    |
| 32   | 87361483            | 87361550           | 5029446        | 175859  | 0                       | -2.593         | 0.000354341 |
| 33   |                     |                    |                |         |                         |                |             |
| 34   | 87394170            | 87394679           | 5537053        | 175871  | 0                       | -3.425         | 0.000483463 |

Ave. fold reduction other than deleted exons 23 and 24: -2.410  
SD: 0.338  
n: 31  
SEM: 0.061

Supplementary Figures

Fig. S1: Movie of sperm from wt/wt and tm/tm STAMP in IVF solution and in proximity of oocytes. (See separate file labeled "IVF movie.wmv")

Fig. S2: Assignment of missing doublet in axonema of *Stamp*<sup>tm/tm</sup> mice.

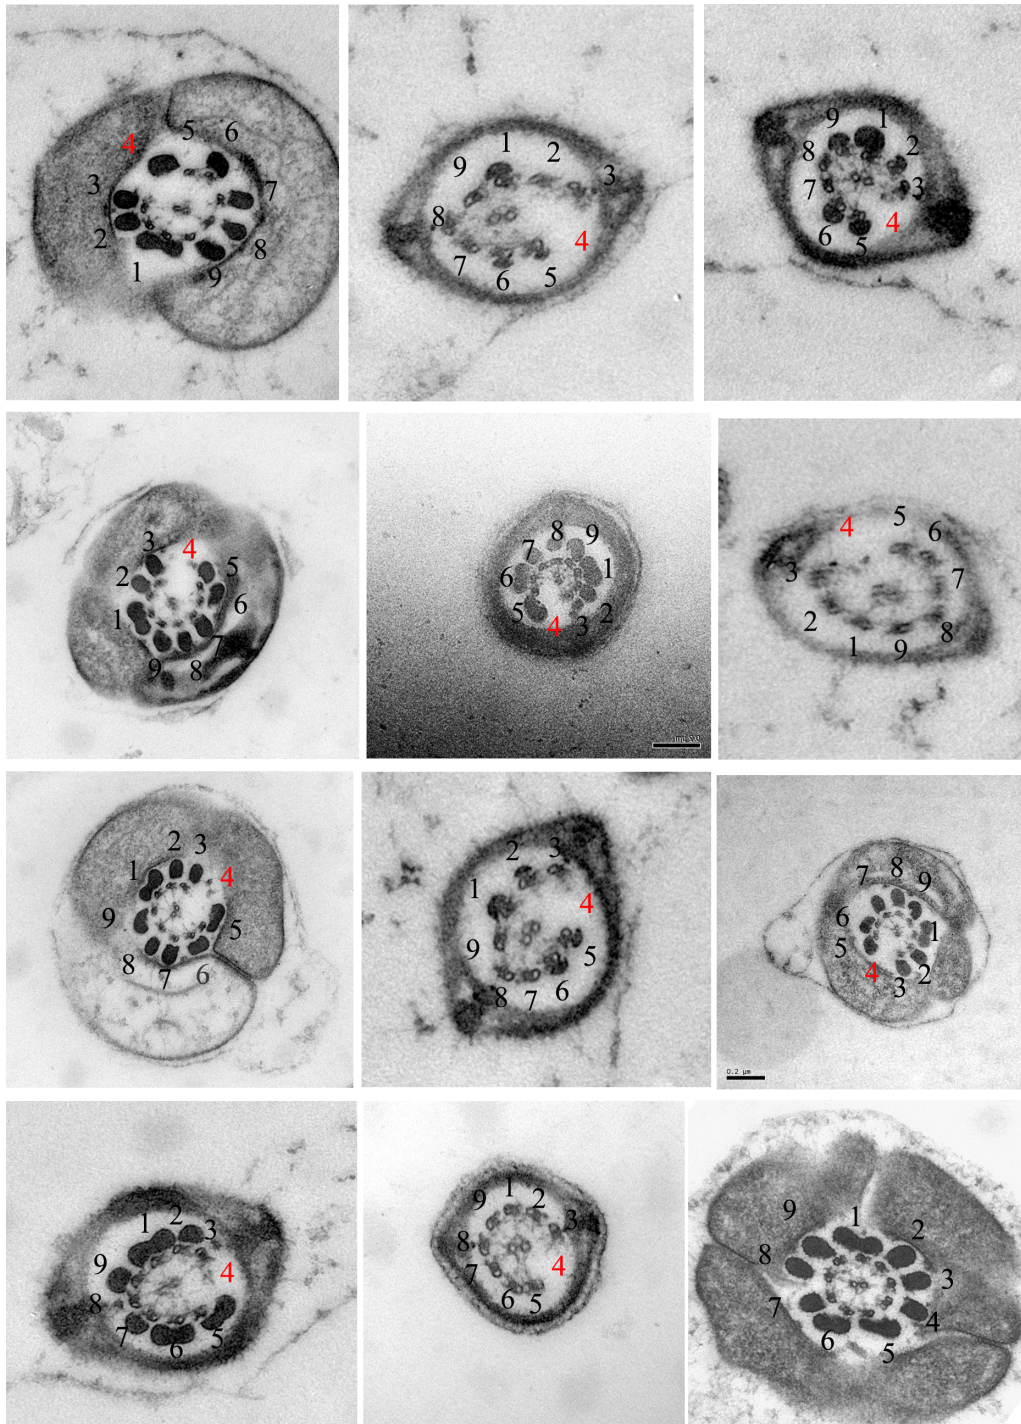

Intact canonical 9+2  
microtubule axoneme

Normal 9+2 microtubule axonemal structure of wt/wt sperm is shown in bottom right panel. Missing doublet 4 (in red) in tm/tm sperm was identified as described in Experimental Procedures of main text.

Fig. S3: Comparison of spermatogenesis-relating gene expressions in *Stamp*<sup>tm/tm</sup> mice.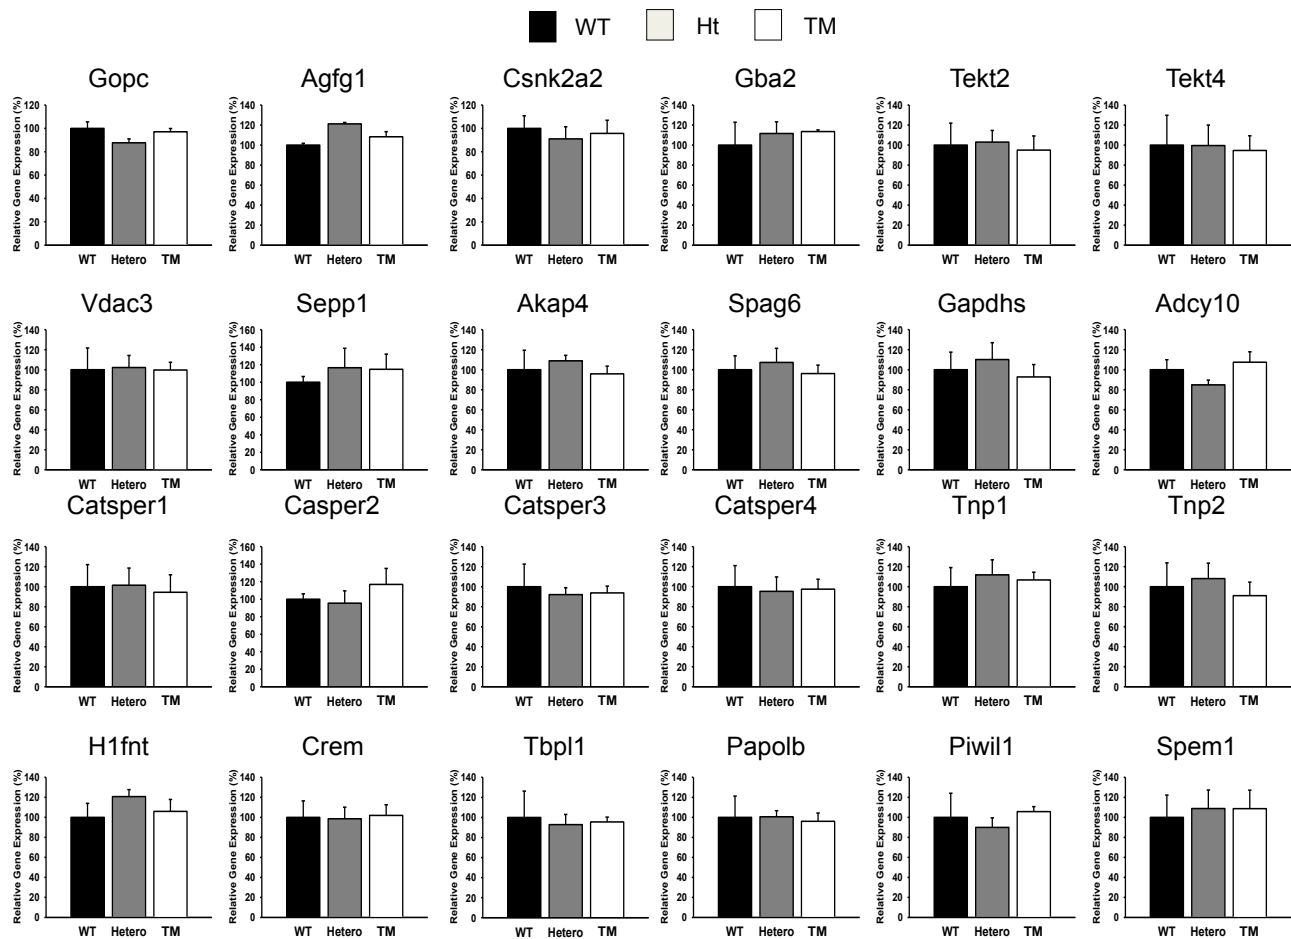

The expression levels of 24 spermatogenesis-related genes were measured in the testis of *Stamp*<sup>+/+</sup> (black filled bar), *Stamp*<sup>+/tm</sup> (gray filled bar) and *Stamp*<sup>tm/tm</sup> (white filled bar) mice (n=3 each genotype) by RT-PCR (see Table 1 for list of primers) after total RNA was reverse-transcribed to first-stand complementary DNA (cDNA) using SuperScript III, First-Strand Synthesis SuperMix for qRT-PCR (Invitrogen) according to the manufacturer's directions. Relative transcript abundance was normalized with glyceraldehyde-3-phosphate dehydrogenase and graphed (Average ± SEMs of duplicate values for all samples).



Fig. S4: Histology of photoreceptors and cochlea of wt and *Stamp*<sup>tm/tm</sup> mice of different ages.

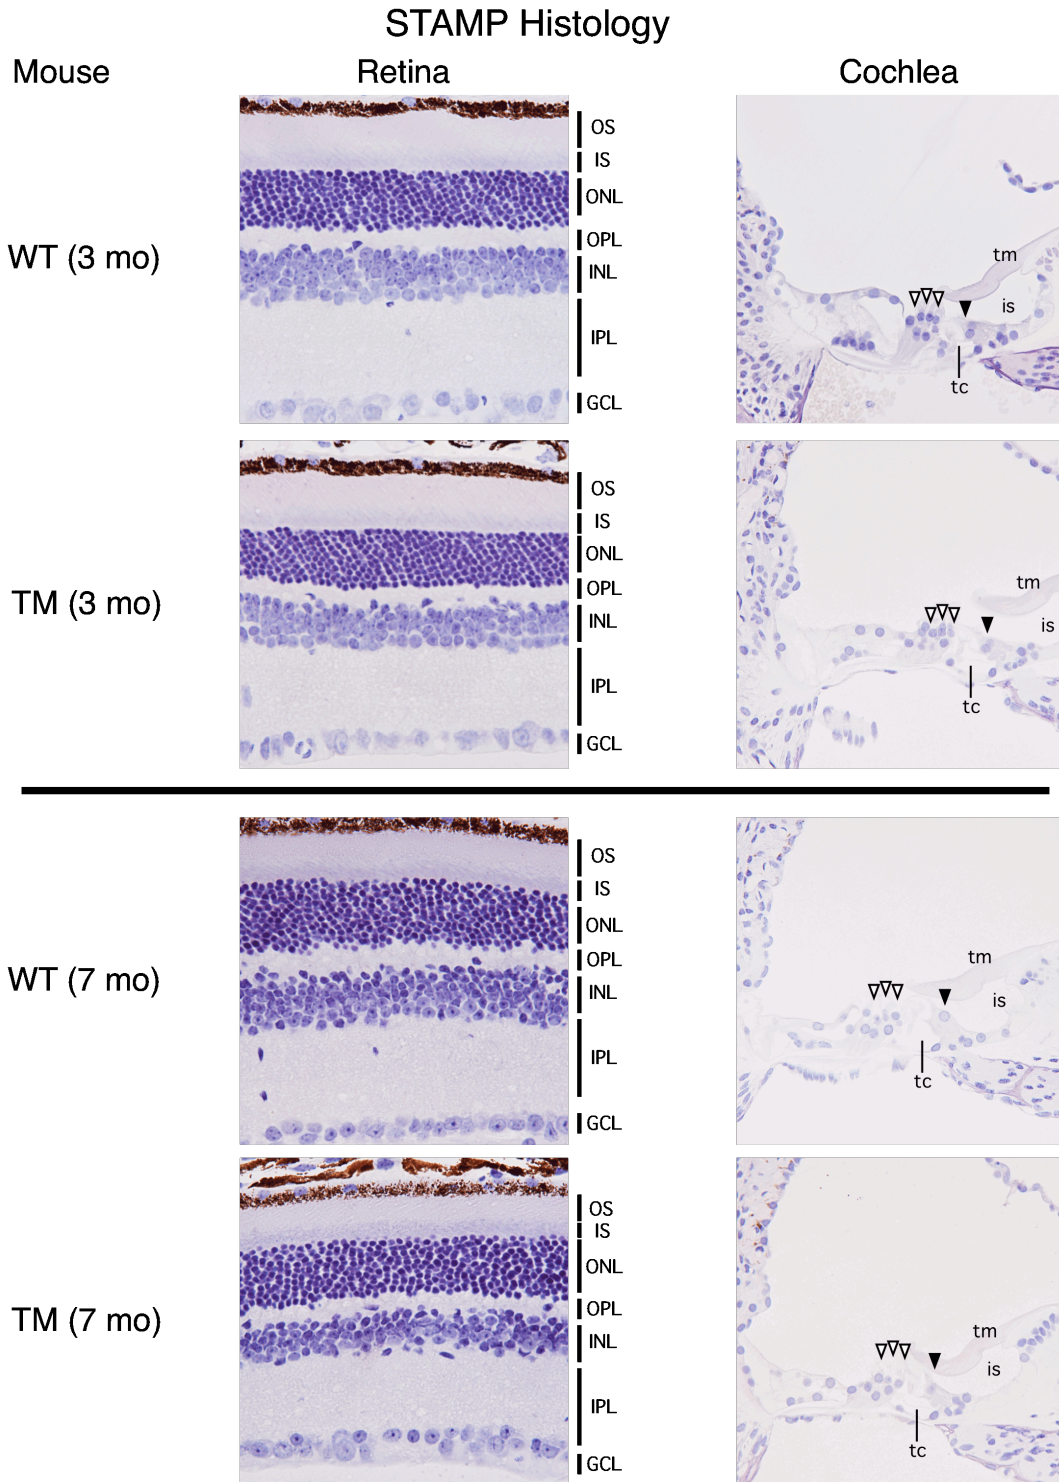

Methods: Retina and cochlea at specified ages were dissected and fixed in freshly prepared 2% paraformaldehyde/3% glutaraldehyde in phosphate buffered saline (PBS) for 24 hr at 4 °C with mild rocking. Samples were then washed 3x in PBS at room temperature for 10 min each, followed by dehydration through a graded series of alcohol. Prior to dehydration, cochleas, but not retinas, were decalcified in 100 mM EDTA in PBS for 14 days refreshing the decalcification solution every 2-3 days. Retinal and cochlear tissues were then embedded in methacrylate plastic according to the manufacture's directions (Polysciences, Warrington, PA), sectioned at 4 µm using a rotary microtome, stained in aqueous Gill's #1 hematoxylin, and coverslipped in Permount. Groups of 2 cochlea from a single mouse, per age, and genotype, were analyzed. Images were captured using Nikon DS-Ri1 camera mounted on a Nikon Eclipse 80i microscope.

Description: Histological examination comparing retina and cochlea from Stamp WT and MT mice at 3 and 7 months of age. Retinal and cochlear structures in Stamp MT mice were normal at both ages. No degeneration of photoreceptors or cochlear inner (open arrowheads) or outer (closed arrowheads) hair cells was evident. OS, outer segment; IS, inner segment; ONL, outer nuclear layer; OPL, outer plexiform layer; INL, inner nuclear layer; IPL, inter plexiform layer; GCL, ganglion cell layer; ohc, outer hair cell; ihc, inner hair cell; tm, tectorial membrane; is; inner sulcus; tc, tunnel of corti.
